# Supplementary material for: Genetic Diversity and Population Structure of a Rhodes Grass (<em>Chloris gayana</em>) Collection
Source: Preprints.org preprint supplement (doi:10.20944/preprints202105.0465.v1), 2021-05-20
Supplement: Supplementary file 1 [file supplementary]

## Sheet: Supplementary information 1
Accessions	doi	Country of origin	Region	latitude	longitude	elevation	Collection site
645	10.18730/G5T81	Tanzania	Africa	-3.1333	36.9717	1050	103.3 km from Arusha towards W.Kilimanjaro 7.9 km from Gomange junction
680	10.18730/G6099	Tanzania	Africa	-6.9388	39.0183	150	34.6 km from Dar-es-Salaam towards Maneromango 22.8 km before Masaki town ship.
692	10.18730/G62ZN	Tanzania	Africa	-6.9662	38.5942	100	45.3 km from Maneromango towards Morogoro
701	10.18730/G652E	Tanzania	Africa	-6.698	38.7292	60	11.3 km from Kikongo towards Morogoro 1.3 km from Mlandise Oruvu plain.
705	10.18730/G65S0	Tanzania	Africa	-6.6276	38.2461	340	11 km from Chalenze towards Morogoro on a plain field.
708	10.18730/G66HR	Tanzania	Africa	-6.9426	37.5712	610	14.8 km from Morogoro towards Iringa
719	10.18730/G68VR	Tanzania	Africa	-7.6006	35.5495	1530	36.9 km from Iringa towards Ruah park
743	10.18730/G6DX1	Tanzania	Africa	-9.0392	34.8211	1950	87.9 km from James corner towards Njombe 23.2 km before Njombe.
890	10.18730/G7KAE	Tanzania	Africa	-3.3266	35.632	1740	19 km from Ngorongoro wild life conservation office towards Kifali hill in the Ngorongoro crater floor.
895	10.18730/G7KFK	Tanzania	Africa	-3.1025	35.3636	1970	14.4 km from Ngorongoro crater wild life lodge towards the crater along the entrance road steep escarpment.
899	10.18730/G7KKQ	Tanzania	Africa	-3.2179	35.6041	1770	SE part of Ngorongoro crater floor near Acacia forest.
977	10.18730/G829C	Rwanda	Africa	-1.85	30.75	1280	National Park Akagera 12.5 km NE from Kiyonza park entrance on western shore of Lake Ihema on track N-wards
981	10.18730/G83HF	Rwanda	Africa	-1.1	30.4667	1300	11.5 km N of Ntoma on main road to Kagitumba/Uganda NE corner of Rwanda region Mutara settlement Rwentanga
993	10.18730/G86T9	Rwanda	Africa	-2.5	30.85	1350	17 km NE of Rusoma on track NE to lake Knoimpanca following Akagera swing
1053	10.18730/FPJZP	Burundi	Africa	-3.2167	29.2333	800	7.5 km N of Gatumba cross road on RN 4 between Bujumbura and Uvira
1097	10.18730/FPYRX	Democratic Republic of Congo	Africa	-0.7667	29.3833	970	10 km East of Rwindi in the Virunga National park on road to Vitshumbi
1118	10.18730/FQ2D=	Democratic Republic of Congo	Africa	-0.0667	29.6667	1030	6.5 km from Ishango at N end of Lake Amin in Virunga park
2023	10.18730/FZ0ER	Ethiopia	Africa	5.3667	39.5333	1420	13 km from Negele Borena towards K.Mengist 107 km before K.Mengist
2199	10.18730/G0WRY	Ethiopia	Africa	11.7333	37.5167	1900	18 km from Bahir Dar towards Wereta 8 km before Amus Gebya along a small river edges
6625	10.18730/G5WM3	Kenya	Africa
6626	10.18730/G5WN4	Kenya	Africa
6627	10.18730/G5WP5	South Africa	Africa
6628	10.18730/G5WQ6	Unknown
6630	10.18730/G5WS8	Kenya	Africa
6631	10.18730/G5WT9	Unknown
6633	10.18730/G5WVA	Tanzania	Africa
6634	10.18730/G5WWB	Unknown
7103	10.18730/G6757	Uganda	Africa
7112	10.18730/G67AC	Tanzania	Africa
7113	10.18730/G67BD	Kenya	Africa
7384	10.18730/G6DHT	Zambia	Africa
7757	10.18730/G6NQX	Ethiopia	Africa	12.2333	37.2833	1840	66 km from Gonder to Gorgora school compound 1/2 km before the centre of town 300 mts S of lake Tana.
9163	10.18730/G7PM9	Ethiopia	Africa	7.9333	38.7167	1600	162 km from Addis Ababa towards Shashemane east of the town of Zwai near the shore of lake Zwai
9422	10.18730/G7WKF	Ethiopia	Africa	10.0167	38	1850	227 km NW of Addis Ababa towards Gojam just off the road on the right side as you face Gojam
10097	10.18730/FP5R6	Ethiopia	Africa	9.73	37.42	1500	323.3 km from Addis Ababa towards Lemlem via Bako 47.3 km from Fincha hydroelectric power station, nr Finche state farm
10101	10.18730/FP5XB	Ethiopia	Africa	9.7	37.43	1600	320 km from Addis Ababa towards Lemlem Bereha State Farm via Fincha, in the maize farm
10225	10.18730/FPA2~	Ethiopia	Africa	7.0667	38.4667	1820	11 km NW of Kofele near Goba cattle breeding station
12968	10.18730/FRTGH	Kenya	Africa	0.2833	35.3833	2290	29 km N of Timborda
13053	10.18730/FRVJE	Kenya	Africa	-1.0167	37.0333	1490	33 km from Nairobi and 18 km from Kahowa military barrack on the way to Thika 7 km from flyover bridge
13072	10.18730/FRVZV	Kenya	Africa	-0.4	36.25	1890	141 km from Nairobi towards Nakuru 22 km before Nakuru near Lake Elmenteta about 300m from the junction of the road
13080	10.18730/FRW5~	Kenya	Africa	7.1833	36.0833	1760	6.7 km from Nakuru town towards Lake Nakuru
13082	10.18730/FRW7=	Kenya	Africa	-0.2	35.85	1980	29.8 km from Nakuru near Molo river bridge exactly on the edge of the road
13097	10.18730/FRWMB	Kenya	Africa	1.05	34.95	1900	427.1 km from Nairobi towards Endebess 7.1 km from Kitale right side of the road near a small hill.
13103	10.18730/FRWTH	Kenya	Africa	1.1	34.8	1940	27.1 km from Kitale and 7.4 km from Endebess towards Mt.Elgon.
13110	10.18730/FRWZP	Kenya	Africa	1.15	35.0167	1910	434 km from Nairobi towards Kapenguria 140 km from Kitale side of the road.
13175	10.18730/FRYE*	Kenya	Africa	-0.6333	33.3833	1160	10 km from Homa Bay towards Kissi
13229	10.18730/FRZR0	Kenya	Africa	-0.3	35.8333	2150	6.2 km before El-burgon on the Nakuru-Elburgon road
13317	10.18730/FS20=	Unknown
13329	10.18730/FS297	Uganda	Africa
13330	10.18730/FS2A8	Kenya	Africa
13403	10.18730/FS43W	Ethiopia	Africa	8.6167	39.1	1760	2 km N of Mojo towards Addis Ababa.
13487	10.18730/FS6BT	Ethiopia	Africa	6.1333	37.5833	1860	16 km S of Chencha towards Arba Minch
15569	10.18730/FTTFX	South Africa	Africa				West Transvaal
15570	10.18730/FTTGY	South Africa	Africa				Kruger Park
15571	10.18730/FTTHZ	South Africa	Africa				East Transvaal
15572	10.18730/FTTJ*	South Africa	Africa				Natal
15573	10.18730/FTTK~	South Africa	Africa				Soutpan
15574	10.18730/FTTM$	Zimbabwe	Africa
15575	10.18730/FTTN=	Zimbabwe	Africa
15576	10.18730/FTTPU	Zimbabwe	Africa
15577	10.18730/FTTQ0	Zimbabwe	Africa
15578	10.18730/FTTR1	Zimbabwe	Africa				Sengwa River Flood Plain
18487	10.18730/FX9E3	Tanzania	Africa	-4	35.779	1000	23 km N of Babati on rd to Arusha.
18498	10.18730/FX9RD	Tanzania	Africa	-3.17	-35.52	1800	Ngorongoro Crater Floor. Mandusi area, near lake.
19553	10.18730/FYADP	Uganda	Africa
19554	10.18730/FYAEQ	Tanzania	Africa	-6.3097	36.4987	1053	Mpwapwa
19555	10.18730/FYAFR	Sudan	Africa
19556	10.18730/FYAGS	Ethiopia	Africa	7.4	38.67		150km.S Modja
19557	10.18730/FYAHT	Kenya	Africa	0.07	34.2		Alego
19558	10.18730/FYAJV	Democratic Republic of Congo	Africa				Nile-Congo highlands
19559	10.18730/FYAKW	South Africa	Africa	-30.1999	30.7999	1	Umkomaas river area along coastal road, S Durban
19560	10.18730/FYAMX	Zimbabwe	Africa
19561	10.18730/FYANY	Zimbabwe	Africa
19562	10.18730/FYAPZ	Zimbabwe	Africa	-20.2	32.3		Sabai valley,Chipinga area
19563	10.18730/FYAQ*	Zimbabwe	Africa	-17.5332	30.4499	1356	Mr.Faeds farm,Trelawney
19564	10.18730/FYAR~	Uganda	Africa
19565	10.18730/FYAS$	Kenya	Africa
19566	10.18730/FYAT=	Kenya	Africa
19567	10.18730/FYAVU	Kenya	Africa
19568	10.18730/FYAW0	Kenya	Africa
19570	10.18730/FYAY2	Kenya	Africa
19571	10.18730/FYAZ3	Senegal	Africa
19572	10.18730/FYB04	India	Asia
19573	10.18730/FYB15	South Africa	Africa
19574	10.18730/FYB26	Kenya	Africa
19575	10.18730/FYB37	Kenya	Africa
19576	10.18730/FYB48	Kenya	Africa	1.0544	35.0032	1800	Nr.Kitale
19577	10.18730/FYB59	Kenya	Africa
19578	10.18730/FYB6A	Uganda	Africa	0.6		1400
19579	10.18730/FYB7B	Kenya	Africa
19580	10.18730/FYB8C	Unknown
19581	10.18730/FYB9D	Tanzania	Africa
19582	10.18730/FYBAE	Ethiopia	Africa	11.55	37.4167	1766	Nr.Bahar Dar
19583	10.18730/FYBBF	Malawi	Africa
19584	10.18730/FYBCG	Kenya	Africa				Rongai area of Rift Valley
19585	10.18730/FYBDH	Malawi	Africa
19586	10.18730/FYBEJ	Malawi	Africa
19587	10.18730/FYBFK	Malawi	Africa
19588	10.18730/FYBGM	Malawi	Africa
19589	10.18730/FYBHN	Malawi	Africa
19590	10.18730/FYBJP	Kenya	Africa			1818
19591	10.18730/FYBKQ	Kenya	Africa
19592	10.18730/FYBMR	Uganda	Africa
19593	10.18730/FYBNS	Unknown
