# Supplementary material for: Genetic Diversity and Population Structure of a Rhodes Grass (<em>Chloris gayana</em>) Collection
Source: Preprints.org preprint supplement (doi:10.20944/preprints202105.0465.v1), 2021-05-20
Supplement: Supplementary file 3 [file Table S2 Cluster group of individual accession.xlsx]

## Sheet: supplementary table 2
Accessions	doi	Country of origin	Region	Hierarchical cluster		Population structure
				SNP	SilicoDArT	SNP	SilicoODArT
645	10.18730/G5T81	Tanzania	Africa	I	I	I	II
680	10.18730/G6099	Tanzania	Africa	I	II	I	II
692	10.18730/G62ZN	Tanzania	Africa	I	II	I	II
701	10.18730/G652E	Tanzania	Africa	I	II	I	II
705	10.18730/G65S0	Tanzania	Africa	I	I	I	II
708	10.18730/G66HR	Tanzania	Africa	II	III	I	I
719	10.18730/G68VR	Tanzania	Africa	I	I	I	II
743	10.18730/G6DX1	Tanzania	Africa	I	I	I	II
890	10.18730/G7KAE	Tanzania	Africa	I	I	I	II
895	10.18730/G7KFK	Tanzania	Africa	I	I	I	II
899	10.18730/G7KKQ	Tanzania	Africa	I	I	I	II
977	10.18730/G829C	Rwanda	Africa	I	I	I	II
981	10.18730/G83HF	Rwanda	Africa	I	I	I	II
993	10.18730/G86T9	Rwanda	Africa	I	I	I	II
1053	10.18730/FPJZP	Burundi	Africa	II	III	I	I
1097	10.18730/FPYRX	Democratic Republic of Congo	Africa	II	III	I	I
1118	10.18730/FQ2D=	Democratic Republic of Congo	Africa	II	I	I	I
2023	10.18730/FZ0ER	Ethiopia	Africa	I	I	I	II
2199	10.18730/G0WRY	Ethiopia	Africa	I	I	I	II
6625	10.18730/G5WM3	Kenya	Africa	I	I	I	II
6626	10.18730/G5WN4	Kenya	Africa	I	III	I	I
6627	10.18730/G5WP5	South Africa	Africa	I	I	I	II
6628	10.18730/G5WQ6	Unknown		I	I	I	II
6630	10.18730/G5WS8	Kenya	Africa	I	I	I	II
6631	10.18730/G5WT9	Unknown		I	I	I	II
6633	10.18730/G5WVA	Tanzania	Africa	I	I	I	II
6634	10.18730/G5WWB	Unknown		I	I	I	II
7103	10.18730/G6757	Uganda	Africa	I	I	I	II
7112	10.18730/G67AC	Tanzania	Africa	I	I	I	II
7113	10.18730/G67BD	Kenya	Africa	I	I	I	II
7384	10.18730/G6DHT	Zambia	Africa	I	I	II	II
7757	10.18730/G6NQX	Ethiopia	Africa	I	I	II	II
9163	10.18730/G7PM9	Ethiopia	Africa	I	I	II	II
9422	10.18730/G7WKF	Ethiopia	Africa	II	I	II	I
10097	10.18730/FP5R6	Ethiopia	Africa	II	III	II	I
10101	10.18730/FP5XB	Ethiopia	Africa	I	I	II	II
10225	10.18730/FPA2~	Ethiopia	Africa	I	I	II	II
12968	10.18730/FRTGH	Kenya	Africa	I	I	II	II
13053	10.18730/FRVJE	Kenya	Africa	I	I	II	II
13072	10.18730/FRVZV	Kenya	Africa	I	I	II	II
13080	10.18730/FRW5~	Kenya	Africa	I	I	II	II
13082	10.18730/FRW7=	Kenya	Africa	I	III	II	I
13097	10.18730/FRWMB	Kenya	Africa	I	I	II	II
13103	10.18730/FRWTH	Kenya	Africa	I	I	II	II
13110	10.18730/FRWZP	Kenya	Africa	I	I	II	II
13175	10.18730/FRYE*	Kenya	Africa	I	I	II	II
13229	10.18730/FRZR0	Kenya	Africa	I	I	II	II
13317	10.18730/FS20=	Unknown		I	I	II	II
13329	10.18730/FS297	Uganda	Africa	I	I	II	II
13330	10.18730/FS2A8	Kenya	Africa	I	I	II	II
13403	10.18730/FS43W	Ethiopia	Africa	I	I	II	II
13487	10.18730/FS6BT	Ethiopia	Africa	II	I	II	I
15569	10.18730/FTTFX	South Africa	Africa	II	III	II	I
15570	10.18730/FTTGY	South Africa	Africa	II	III	II	I
15571	10.18730/FTTHZ	South Africa	Africa	II	III	II	I
15572	10.18730/FTTJ*	South Africa	Africa	II	III	II	I
15573	10.18730/FTTK~	South Africa	Africa	II	III	II	I
15574	10.18730/FTTM$	Zimbabwe	Africa	I	I	II	II
15575	10.18730/FTTN=	Zimbabwe	Africa	I	I	II	II
15576	10.18730/FTTPU	Zimbabwe	Africa	II	III	II	I
15577	10.18730/FTTQ0	Zimbabwe	Africa	I	I	II	II
15578	10.18730/FTTR1	Zimbabwe	Africa	II	III	II	I
18487	10.18730/FX9E3	Tanzania	Africa	I	I	II	II
18498	10.18730/FX9RD	Tanzania	Africa	I	I	II	II
19553	10.18730/FYADP	Uganda	Africa	I	I	II	II
19554	10.18730/FYAEQ	Tanzania	Africa	I	I	II	II
19555	10.18730/FYAFR	Sudan	Africa	II	III	II	I
19556	10.18730/FYAGS	Ethiopia	Africa	II	III	II	I
19557	10.18730/FYAHT	Kenya	Africa	I	I	II	II
19558	10.18730/FYAJV	Democratic Republic of Congo	Africa	II	III	II	I
19559	10.18730/FYAKW	South Africa	Africa	I	I	II	II
19560	10.18730/FYAMX	Zimbabwe	Africa	I	I	II	II
19561	10.18730/FYANY	Zimbabwe	Africa	II	II	II	I
19562	10.18730/FYAPZ	Zimbabwe	Africa	I	I	II	II
19563	10.18730/FYAQ*	Zimbabwe	Africa	I	I	II	I
19564	10.18730/FYAR~	Uganda	Africa	I	I	II	II
19565	10.18730/FYAS$	Kenya	Africa	I	I	II	II
19566	10.18730/FYAT=	Kenya	Africa	I	I	II	II
19567	10.18730/FYAVU	Kenya	Africa	I	I	II	II
19568	10.18730/FYAW0	Kenya	Africa	II	III	II	I
19570	10.18730/FYAY2	Kenya	Africa	II	III	II	I
19571	10.18730/FYAZ3	Senegal	Africa	II	III	II	I
19572	10.18730/FYB04	India	Asia	I	I	II	II
19573	10.18730/FYB15	South Africa	Africa	II	III	II	I
19574	10.18730/FYB26	Kenya	Africa	II	III	II	I
19575	10.18730/FYB37	Kenya	Africa	I	I	II	II
19576	10.18730/FYB48	Kenya	Africa	II	III	II	I
19577	10.18730/FYB59	Kenya	Africa	I	I	II	II
19578	10.18730/FYB6A	Uganda	Africa	I	I	II	II
19579	10.18730/FYB7B	Kenya	Africa	I	II	II	II
19580	10.18730/FYB8C	Unknown		I	II	II	II
19581	10.18730/FYB9D	Tanzania	Africa	I	I	II	II
19582	10.18730/FYBAE	Ethiopia	Africa	I	I	II	II
19583	10.18730/FYBBF	Malawi	Africa	I	I	II	II
19584	10.18730/FYBCG	Kenya	Africa	I	I	II	II
19585	10.18730/FYBDH	Malawi	Africa	I	I	II	II
19586	10.18730/FYBEJ	Malawi	Africa	I	I	II	II
19587	10.18730/FYBFK	Malawi	Africa	I	I	II	II
19588	10.18730/FYBGM	Malawi	Africa	I	I	II	II
19589	10.18730/FYBHN	Malawi	Africa	I	I	II	II
19590	10.18730/FYBJP	Kenya	Africa	I	II	II	II
19591	10.18730/FYBKQ	Kenya	Africa	I	II	II	II
19592	10.18730/FYBMR	Uganda	Africa	II	II	II	I
19593	10.18730/FYBNS	Unknown		I	II	II	II
